# Supplementary material for: Matching-Adjusted Indirect Comparison of the Efficacy and Safety of Erdafitinib vs Enfortumab Vedotin in Patients with Locally Advanced Metastatic Urothelial Carcinoma
Source: PubMed Central journal article supplement (PMC11392482; doi:10.36469/001c.120954), 2024-08-20
Supplement: jheor_2024_11_2_120954_242503.pdf [file jheor_2024_11_2_120954_242503.pdf]

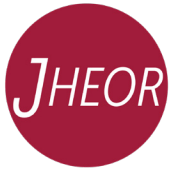

## Online Supplementary Material

Matching-Adjusted Indirect Comparison of the Efficacy and Safety of Erdaftinib vs Enfortumab Vedotin in Patients With Locally Advanced Metastatic Urothelial Carcinoma. *JHEOR*. 2024;11(2):49-57. [doi:10.36469/jheor.2024.120954](https://doi.org/10.36469/jheor.2024.120954)

**Table S1: Study Characteristics of THOR and EV-301**

**Table S2: Key Inclusion and Exclusion Criteria in THOR and EV-301**

**Table S3: Treatment Characteristics in THOR and EV-301**

**Table S4: Endpoint Definitions in THOR and EV-301**

This supplementary material has been provided by the authors to give readers additional information about their work.

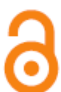

**Table S1. Study Characteristics of THOR and EV-301**

|                                  | THOR                                                                                                                                                                                                                             | EV-301                                                                                                                                                                                            |
|----------------------------------|----------------------------------------------------------------------------------------------------------------------------------------------------------------------------------------------------------------------------------|---------------------------------------------------------------------------------------------------------------------------------------------------------------------------------------------------|
| Study design                     | RCT                                                                                                                                                                                                                              | RCT                                                                                                                                                                                               |
| Trial phase                      | Phase 3                                                                                                                                                                                                                          | Phase 3                                                                                                                                                                                           |
| Blinding                         | Open label                                                                                                                                                                                                                       | Open label                                                                                                                                                                                        |
| Concealment of randomization     | Adequate                                                                                                                                                                                                                         | Adequate                                                                                                                                                                                          |
| Strata during randomization      | <ul style="list-style-type: none"> <li>• Geographic region (North America vs EU vs rest of the world)</li> <li>• ECOG PS ([0 or 1] vs 2)</li> <li>• Presence of visceral metastasis: lung, liver, or bone (yes vs no)</li> </ul> | <ul style="list-style-type: none"> <li>• Geographic region (Western Europe vs US vs rest of the world)</li> <li>• ECOG PS (0 vs 1)</li> <li>• Presence of liver metastasis (yes vs no)</li> </ul> |
| No. of patients (ITT population) | <u>Cohort 1:</u><br>Erdafitinib: 136<br>Physician's choice of chemotherapy: 130                                                                                                                                                  | EV: 301<br>Physician's choice of chemotherapy: 307                                                                                                                                                |
| Location                         | International                                                                                                                                                                                                                    | International                                                                                                                                                                                     |
| Median follow-up                 | <u>Cohort 1:</u><br>Interim/final*: 15.9 months                                                                                                                                                                                  | Interim analysis: 11.1 months<br>Longer-term analysis: 23.75 months                                                                                                                               |
| Cross-over                       | Crossover allowed after interim analysis <sup>§</sup>                                                                                                                                                                            | Allowed if positive results observed in interim analysis <sup>§</sup>                                                                                                                             |

\* Cohort 1 was stopped at interim analysis due to superiority of erdafitinib over chemotherapy; interim analysis is considered final analysis.

<sup>§</sup> In both trials, there is no cross-over within the interim analysis data-cut, which served as the basis for the MAIC. However, it remains uncertain whether the longer-term analysis for EV-301 include any instances of cross-over, and if so, whether the analysis has been appropriately adjusted to account for it.

Abbreviations: ECOG PS, Eastern Cooperative Oncology Group performance status; EU, European Union; EV, enfortumab vedotin; ITT, Intention-to-treat; OS, overall survival; PFS, progression-free survival; RCT, randomized controlled trial; US, United States.

**Table S2. Key Inclusion and Exclusion Criteria in THOR and EV-301**

|                                 | THOR<br>(NCT03390504)                                                                                                                                                                                                                                                                                                                                                                                                                                                                                                                                                                                                                                                                                                                                                                                                                                                                                                                                                             | EV-301<br>(NCT03474107)                                                                                                                                                                                                                                                                                                                                                                                                                                                         |
|---------------------------------|-----------------------------------------------------------------------------------------------------------------------------------------------------------------------------------------------------------------------------------------------------------------------------------------------------------------------------------------------------------------------------------------------------------------------------------------------------------------------------------------------------------------------------------------------------------------------------------------------------------------------------------------------------------------------------------------------------------------------------------------------------------------------------------------------------------------------------------------------------------------------------------------------------------------------------------------------------------------------------------|---------------------------------------------------------------------------------------------------------------------------------------------------------------------------------------------------------------------------------------------------------------------------------------------------------------------------------------------------------------------------------------------------------------------------------------------------------------------------------|
| <b>Inclusion criteria</b>       |                                                                                                                                                                                                                                                                                                                                                                                                                                                                                                                                                                                                                                                                                                                                                                                                                                                                                                                                                                                   |                                                                                                                                                                                                                                                                                                                                                                                                                                                                                 |
| Age                             | ≥18 years                                                                                                                                                                                                                                                                                                                                                                                                                                                                                                                                                                                                                                                                                                                                                                                                                                                                                                                                                                         | ≥ 18 years                                                                                                                                                                                                                                                                                                                                                                                                                                                                      |
| Disease status                  | <ul style="list-style-type: none"> <li>Histologic demonstration of transitional cell carcinoma of the urothelium</li> <li>Metastatic or surgically unresectable urothelial cancer</li> </ul>                                                                                                                                                                                                                                                                                                                                                                                                                                                                                                                                                                                                                                                                                                                                                                                      | <ul style="list-style-type: none"> <li>Histologically or cytologically confirmed urothelial carcinoma</li> <li>Has radiologically documented metastatic or locally advanced disease at baseline</li> </ul>                                                                                                                                                                                                                                                                      |
| Progression and prior treatment | <ul style="list-style-type: none"> <li>Documented progression of disease, defined as any progression that requires a change in treatment, prior to randomization</li> <li>Prior treatment with an anti-PD(L) 1 agent as monotherapy or as combination therapy, given as neo-adjuvant, adjuvant, or in metastatic line of treatment as frontline or maintenance therapy</li> <li>≤ 2 prior lines of systemic treatment</li> </ul>                                                                                                                                                                                                                                                                                                                                                                                                                                                                                                                                                  | <ul style="list-style-type: none"> <li>Have experienced radiographic progression or relapse during, or after CPI (anti-PD-1 or anti-PD-L1) for locally advanced or metastatic disease</li> <li>Have received a platinum containing regimen in the metastatic/locally advanced, neoadjuvant or adjuvant setting. If platinum was administered in the adjuvant/neoadjuvant setting subject must have progressed within 12 months of completion.</li> </ul>                        |
| ECOG PS                         | 0-2                                                                                                                                                                                                                                                                                                                                                                                                                                                                                                                                                                                                                                                                                                                                                                                                                                                                                                                                                                               | 0-1                                                                                                                                                                                                                                                                                                                                                                                                                                                                             |
| Baseline laboratory data        | <ul style="list-style-type: none"> <li>ANC ≥1500/mm<sup>3</sup></li> <li>Platelet count &gt;75,000/mm<sup>3</sup> (≥100,000/mm<sup>3</sup> for Cohort 1 subjects at sites choosing vinflunine chemotherapy)</li> <li>Hemoglobin &gt;8.0 g/dL</li> <li>Total bilirubin ≤1.5 x ULN OR direct bilirubin ≤ ULN for subjects with total bilirubin levels &gt;1.5xULN [≤1xULN for Cohort 1 subjects at sites choosing docetaxel chemotherapy]</li> <li>CrCl &gt;30 mL/min either directly measured via 24-hour urine collection or calculated using the Cockcroft-Gault formula</li> <li>ALT and AST ≤2.5x institutional ULN or ≤5x institutional ULN for subjects with liver metastases (For subjects in Cohort 1 at sites choosing docetaxel chemotherapy, both the ALT and AST values must be ≤1.5xULN concomitant with alkaline phosphatase of ≤2.5xULN)</li> <li>Phosphate: &lt;ULN within 14 days of treatment and prior to Cycle 1 Day 1 (medical management allowed)</li> </ul> | <ul style="list-style-type: none"> <li>ANC ≥1500/mm<sup>3</sup></li> <li>Platelet count ≥100 x 10<sup>9</sup>/L</li> <li>Hemoglobin ≥9 g/dL</li> <li>Serum total bilirubin ≤1.5x ULN or ≤3x ULN for subjects with Gilbert's disease</li> <li>CrCl ≥30 mL/min as estimated per institutional standards or as measured by 24hour urine collection (GFR can also be used instead of CrCl)</li> <li>ALT and AST ≤2.5 × ULN or ≤3x ULN for subjects with liver metastases</li> </ul> |
| Molecular                       | <ul style="list-style-type: none"> <li>Tumors must have ≥1 of the following translocations: FGFR2-BICC1, FGFR2-CASP7, FGFR3- TACC3, FGFR3-BAIAP2L1; or 1 of the following FGFR3 gene mutations: R248C, S249C, G370C, Y373C</li> </ul>                                                                                                                                                                                                                                                                                                                                                                                                                                                                                                                                                                                                                                                                                                                                             |                                                                                                                                                                                                                                                                                                                                                                                                                                                                                 |
| <b>Exclusion criteria</b>       |                                                                                                                                                                                                                                                                                                                                                                                                                                                                                                                                                                                                                                                                                                                                                                                                                                                                                                                                                                                   |                                                                                                                                                                                                                                                                                                                                                                                                                                                                                 |

|                 | THOR<br>(NCT03390504)                                                                                                                                                                                                                                                                                                                                                                                                                                                                                                                                                                                                                                                                                                                                                       | EV-301<br>(NCT03474107)                                                                                                                                                                                                                                                                                                                                                                                                                                                                                                                                                 |
|-----------------|-----------------------------------------------------------------------------------------------------------------------------------------------------------------------------------------------------------------------------------------------------------------------------------------------------------------------------------------------------------------------------------------------------------------------------------------------------------------------------------------------------------------------------------------------------------------------------------------------------------------------------------------------------------------------------------------------------------------------------------------------------------------------------|-------------------------------------------------------------------------------------------------------------------------------------------------------------------------------------------------------------------------------------------------------------------------------------------------------------------------------------------------------------------------------------------------------------------------------------------------------------------------------------------------------------------------------------------------------------------------|
| Disease status  | <ul style="list-style-type: none"> <li>• Active malignancies (requiring treatment change in the last 24 months) with the exception of <ul style="list-style-type: none"> <li>○ urothelial cancer</li> <li>○ Skin cancer treated within the last 24 months that is considered completely cured</li> <li>○ localized prostate cancer with a Gleason score of 6 (treated within the last 24 months or untreated and under surveillance)</li> <li>○ localized prostate cancer with a Gleason score of 3+4 that has been treated more than 6 months prior to full study screening and considered to have a very low risk of recurrence</li> </ul> </li> <li>• Symptomatic CNS metastases</li> <li>• Current CSR or retinal pigment epithelial detachment of any grade</li> </ul> | <ul style="list-style-type: none"> <li>• Has preexisting sensory or motor neuropathy Grade <math>\geq 2</math></li> <li>• Has active CNS metastases</li> </ul>                                                                                                                                                                                                                                                                                                                                                                                                          |
| Prior treatment | <ul style="list-style-type: none"> <li>• Received prior FGFR inhibitor treatment</li> <li>• Not recovered from reversible toxicity of prior anticancer therapy</li> <li>• Major surgery within 4 weeks before randomization</li> </ul>                                                                                                                                                                                                                                                                                                                                                                                                                                                                                                                                      | <ul style="list-style-type: none"> <li>• Prior treatment with EV or other MMAE-based ADCs</li> <li>• Received prior chemotherapy for UC with all available study therapies in the control arm</li> <li>• Received <math>&gt;1</math> prior chemotherapy regimen for locally advanced or metastatic urothelial cancer</li> <li>• Ongoing clinically significant toxicity (<math>\geq</math> Grade 2 with the exception of alopecia) associated with prior treatment</li> <li>• Radiotherapy or major surgery within 4 weeks prior to first dose of study drug</li> </ul> |
| Medical history | <ul style="list-style-type: none"> <li>• History of uncontrolled cardiovascular disease</li> <li>• Known active AIDS (human immunodeficiency virus (HIV) infection)</li> <li>• Known active hepatitis B or C infection</li> <li>• Impaired wound healing capacity defined as skin/decubitus ulcers, chronic leg ulcers, known gastric ulcers, or unhealed incisions</li> </ul>                                                                                                                                                                                                                                                                                                                                                                                              | <ul style="list-style-type: none"> <li>• History of another malignancy within 3 years</li> <li>• History of a cerebral vascular, unstable angina, myocardial infarction, or cardiac symptoms (NYHAC III-IV) within 6 months prior trial</li> <li>• Known history of HIV infection</li> <li>• Known active hepatitis B or C</li> <li>• Known active keratitis or corneal ulcerations</li> <li>• History of uncontrolled diabetes mellitus within 3 months prior study</li> </ul>                                                                                         |

Abbreviations: ADC, antibody drug conjugate; AIDS, acquired immune deficiency syndrome; ALT, alanine aminotransferase; ANC, absolute neutrophil count; AST, aspartate aminotransferase; CNS, central nervous system; CPI, checkpoint inhibitor; CrCl, Creatinine Clearance; CSR, central serous retinopathy; EV, enfortumab vedotin; FGFR, fibroblast growth factor receptor; GFR, glomerular filtration rate; HIV, human immunodeficiency virus; NYHAC, New York Heart Association (NYHA) Classification; MMAE, monomethyl auristatin E; PD-(L)1, programmed cell death protein/programmed cell death ligand-1; ULN, upper limit of normal

**Table S3. Treatment Characteristics in THOR and EV-301**

|                            | THOR                                                                          |                                                         | EV-301                                                                                                                                                                                                |                                                                                       |
|----------------------------|-------------------------------------------------------------------------------|---------------------------------------------------------|-------------------------------------------------------------------------------------------------------------------------------------------------------------------------------------------------------|---------------------------------------------------------------------------------------|
| Intervention               | Erdafitinib                                                                   | Physician's choice of chemotherapy (Vin, Doc)           | EV                                                                                                                                                                                                    | Physician's choice of chemotherapy (Vin, Doc, Pac)                                    |
| Dose                       | 8 mg with a pharmacodynamically guided increase in the dose to 9 mg on day 14 | Vin: 320 mg/m <sup>2</sup><br>Doc: 75 mg/m <sup>2</sup> | 1.25 mg/kg                                                                                                                                                                                            | Vin: 320 mg/m <sup>2</sup><br>Doc: 75 mg/m <sup>2</sup><br>Pac: 175 mg/m <sup>2</sup> |
| Frequency and cycle length | Once daily for 21 days in a 21-day cycle                                      | Vin/Doc: once every 3 weeks                             | Days 1, 8, and 15 of a 28-day cycle.                                                                                                                                                                  | Vin/Doc/Pac: Day 1 of a 21-day cycle                                                  |
| Route of administration    | Oral                                                                          | Vin/Doc: IV                                             | IV                                                                                                                                                                                                    | Vin/Doc/Pac: IV                                                                       |
| Treatment duration         | until the occurrence of disease progression or unacceptable toxic effects.    |                                                         | Until radiological disease progression as determined per investigator assessment or other discontinuation criteria were met or upon study termination, or study completion, whichever occurred first. |                                                                                       |

Abbreviations: Doc, docetaxel; EV, enfortumab vedotin; IV, intravenous; NR, not reported; Pac, paclitaxel; Vin, vinflunine.

**Table S3. Endpoint Definitions in THOR and EV-301**

|                                      | THOR                                                                                                                                                   | EV-301                                                                                                                                              |
|--------------------------------------|--------------------------------------------------------------------------------------------------------------------------------------------------------|-----------------------------------------------------------------------------------------------------------------------------------------------------|
| <b>OS</b>                            |                                                                                                                                                        |                                                                                                                                                     |
| Outcome definition                   | Time from the date of randomization until the documented date of death                                                                                 | Time from the date of randomization until the documented date of death from any cause                                                               |
| Time frame (median, month)           | 15.9                                                                                                                                                   | 11.1*                                                                                                                                               |
| <b>PFS</b>                           |                                                                                                                                                        |                                                                                                                                                     |
| Criteria                             | RECIST v1.1                                                                                                                                            | RECIST v1.1                                                                                                                                         |
| Assessor                             | Investigator                                                                                                                                           | Investigator                                                                                                                                        |
| Outcome definition                   | Time from the date of randomization to the date of disease progression or relapse from complete response or death, whichever is reported first divided | Time from date of randomization until date of documented radiological disease progression or until death due to any cause, whichever occurred first |
| Timing of assessment                 | Every 6 weeks ( $\pm$ 7 days) <sup>^</sup>                                                                                                             | Every 8 weeks ( $\pm$ 7 days)                                                                                                                       |
| Time frame (median, month)           | 15.9                                                                                                                                                   | 11.1*                                                                                                                                               |
| <b>cORR</b>                          |                                                                                                                                                        |                                                                                                                                                     |
| Criteria                             | RECIST v1.1                                                                                                                                            | RECIST v1.1                                                                                                                                         |
| Assessor                             | Investigator                                                                                                                                           | Investigator                                                                                                                                        |
| Outcome definition                   | Proportion of participants who achieve CR or PR                                                                                                        | Proportion of participants with CR or PR                                                                                                            |
| Timing of assessment                 | Every 6 weeks ( $\pm$ 7 days) <sup>^</sup>                                                                                                             | Every 8 weeks ( $\pm$ 7 days)                                                                                                                       |
| Time frame (median, month)           | 15.9                                                                                                                                                   | 11.1                                                                                                                                                |
| <b>cCR</b>                           |                                                                                                                                                        |                                                                                                                                                     |
| Criteria                             | RECIST v1.1                                                                                                                                            | RECIST v1.1                                                                                                                                         |
| Assessor (BICR, investigator, other) | Investigator                                                                                                                                           | Investigator                                                                                                                                        |
| Outcome definition                   | NR                                                                                                                                                     | Disappearance of all target and nontarget lesions                                                                                                   |
| Timing of assessment                 | Every 6 weeks ( $\pm$ 7 days) <sup>^</sup>                                                                                                             | Every 8 weeks ( $\pm$ 7 days)                                                                                                                       |
| Time frame (median, month)           | 15.9                                                                                                                                                   | 11.1                                                                                                                                                |
| <b>Adverse events</b>                |                                                                                                                                                        |                                                                                                                                                     |
| Criteria                             | CTCAE v 4.03                                                                                                                                           | CTCAE v 4.03                                                                                                                                        |
| Assessor                             | Subject                                                                                                                                                | Investigator                                                                                                                                        |
| Time frame                           | From date of signed informed consent up to 30 days after last dose                                                                                     | From date of signed informed consent up to 30 days after last dose                                                                                  |

\*A longer follow-up time of month 23.75 is available for OS, PFS, and TRAEs.

<sup>^</sup>Every 6 weeks ( $\pm$  7 days) for the first year, and then as per clinically indicated.

Abbreviations: BICR, Blinded Independent Central Review; cCR, confirmed complete response; cORR, confirmed objective or overall response rate; CTCAE, National Cancer Institute Common Terminology Criteria for Adverse Events; NR, not reported; PR, partial response.

**Table S5. Patient Demographics and Baseline Characteristics in THOR and EV-301**

|                                                    | THOR<br>NCT03390504     |                          | EV-301<br>NCT03474107 |                          |
|----------------------------------------------------|-------------------------|--------------------------|-----------------------|--------------------------|
|                                                    | Erdafitinib<br>(N, 136) | Chemotherapy<br>(N, 130) | EV<br>(N, 301)        | Chemotherapy<br>(N, 307) |
| <b>Age in years</b>                                |                         |                          |                       |                          |
| Median (min, max)                                  | 66.0 (32, 85)           | 69.0 (35, 86)            | 68.0 (34.0, 85.0)     | 68.0 (30.0, 88.0)        |
| ≥75, n (%)                                         | 26 (19.1)               | 30 (23.1)                | 52 (17.3)             | 68 (22.1)                |
| <b>Sex, n (%)</b>                                  |                         |                          |                       |                          |
| Male                                               | 96 (70.6)               | 94 (72.3)                | 238 (79.1)            | 232 (75.6)               |
| <b>Geographic region n (%)</b>                     |                         |                          |                       |                          |
| Europe                                             | 82 (60.3)               | 80 (61.5)                | 126 (41.9)            | 129 (42.0)               |
| North America                                      | 8 (5.9)                 | 5 (3.8)                  | 43 (14.3)             | 44 (14.3)                |
| Rest of the world                                  | 46 (33.8)               | 45 (34.6)                | 132 (43.9)            | 134 (43.6)               |
| <b>Race, n (%)</b>                                 |                         |                          |                       |                          |
| White                                              | 81 (59.6)               | 63 (48.5)                | –                     | –                        |
| Asian                                              | 37 (27.2)               | 40 (30.8)                | –                     | –                        |
| Black or African American                          | 0                       | 1 (0.8)                  | –                     | –                        |
| Multiple                                           | 0                       | 1 (0.8)                  | –                     | –                        |
| Not reported                                       | 18 (13.2)               | 25 (19.2)                | –                     | –                        |
| <b>Tobacco use, n (%)</b>                          |                         |                          |                       |                          |
| Former user                                        | –                       | –                        | 167 (55.5)            | 164 (53.4)               |
| Current user                                       | –                       | –                        | 29 (9.6)              | 31 (10.1)                |
| Never used                                         | 44 (32.4)               | 47 (36.2)                | 91 (30.2)             | 102 (33.2)               |
| Not reported or unknown                            | –                       | –                        | 14 (4.7)              | 10 (3.3)                 |
| <b>History of diabetes or hyperglycemia, n (%)</b> |                         |                          |                       |                          |
| Yes                                                | 11 (8.1)                | 22 (16.9)                | 56 (18.6)             | 58 (18.9)                |
| <b>ECOG PS score, n (%)</b>                        |                         |                          |                       |                          |
| 0                                                  | 63 (46.3)               | 51 (39.2)                | 120 (39.9)            | 124 (40.4)               |
| 1                                                  | 61 (44.9)               | 66 (50.8)                | 181 (60.1)            | 183 (59.6)               |
| 2                                                  | 12 (8.8)                | 13 (10.0)                | -                     | -                        |
| <b>Bellmunt risk score, n (%)</b>                  |                         |                          |                       |                          |
| 0–1                                                | 103 (75.7)              | 95 (73.1)                | 201 (66.8)            | 208 (67.8)               |
| ≥2                                                 | 33 (24.3)               | 35 (26.9)                | 90 (29.9)             | 96 (31.3)                |
| Not reported                                       | –                       | –                        | 10 (3.3)              | 3 (1.0)                  |
| <b>Origin site of primary disease, n (%)</b>       |                         |                          |                       |                          |
| Upper urinary tract                                | 41 (30.1)               | 48 (36.9)                | 98 (32.6)             | 107 (34.9)               |
| Bladder or other site                              | 95 (69.9)               | 82 (63.1)                | 203 (67.4)            | 200 (65.1)               |
| <b>Sites of metastasis, n/total (%)</b>            |                         |                          |                       |                          |
| Lymph node only                                    | –                       | -                        | 34/301 (11.3)         | 28/306 (9.2)             |
| Visceral site                                      | 101 (74.3)              | 97 (74.6)                | 234/301 (77.7)        | 250/306 (81.7)           |

|                                                                                                        | THOR<br>NCT03390504     |                          | EV-301<br>NCT03474107 |                          |
|--------------------------------------------------------------------------------------------------------|-------------------------|--------------------------|-----------------------|--------------------------|
|                                                                                                        | Erdafitinib<br>(N, 136) | Chemotherapy<br>(N, 130) | EV<br>(N, 301)        | Chemotherapy<br>(N, 307) |
| Liver                                                                                                  | 31 (22.8)               | 38 (29.2)                | 93/301 (30.9)         | 95/307 (30.9)            |
| <b>PD(L)-1 status</b>                                                                                  |                         |                          |                       |                          |
| Low expression (CPS <10), n (%)                                                                        | 89 (92.7)               | 68 (86.1)                | –                     | -                        |
| <b>FGFRa/t, n/total (%)</b>                                                                            |                         |                          |                       |                          |
| Mutations                                                                                              | 108/135 (79.4)          | 107/129 (82.3)           | –                     | -                        |
| Fusions                                                                                                | 25/135 (18.4)           | 19/129 (14.6)            | –                     | -                        |
| Mutations and fusions                                                                                  | 2/135 (1.5)             | 3/129 (2.3)              | –                     | -                        |
| <b>Histologic type at initial diagnosis, n/total (%)</b>                                               |                         |                          |                       |                          |
| Urothelial or transitional-cell carcinoma                                                              | –                       | –                        | 229/301 (76.1)        | 230/305 (75.4)           |
| Urothelial carcinoma, mixed types                                                                      | –                       | –                        | 45/301 (15.0)         | 42/305 (13.8)            |
| Other§                                                                                                 | –                       | –                        | 27/301 (9.0)          | 33/305 (10.8)            |
| <b>Histologic type at baseline, n (%)</b>                                                              |                         |                          |                       |                          |
| Transitional cell carcinoma                                                                            | 128 (94.1)              | 124 (95.4)               |                       |                          |
| Transitional cell carcinoma with minor components (<50% overall) of variant histology                  | 8 (5.9)                 | 6 (4.6)                  |                       |                          |
| <b>Previous systemic therapies, n (%)</b>                                                              |                         |                          |                       |                          |
| 1–2                                                                                                    | 135 (99.3)              | 130 (100)                | 262 (87.0)            | 270 (87.9)               |
| ≥3                                                                                                     | 1 (0.7)                 | –                        | 39 (13.0)             | 37 (12.1)                |
| <b>Prior platinum-based chemotherapy, n (%)</b>                                                        |                         |                          |                       |                          |
| None                                                                                                   | 14 (10.3)               | 19 (14.6)                | 0                     | 0                        |
| <b>Best response among patients who previously received checkpoint inhibitor treatment, n (%)¶</b>     |                         |                          |                       |                          |
| Response                                                                                               | –                       | –                        | 61 (20.3)             | 50 (16.3)                |
| No response                                                                                            | –                       | –                        | 207 (68.8)            | 215 (70.0)               |
| <b>Time since diagnosis of metastatic or locally advanced disease in months</b>                        |                         |                          |                       |                          |
| Median (min, max)                                                                                      | –                       | –                        | 14.8 (0.2, 114.1)     | 13.2 (0.3, 118.4)        |
| <b>Time from diagnosis of surgically unresectable or metastatic disease to randomization in months</b> |                         |                          |                       |                          |
| Median (min, max)                                                                                      | 12.9 (0.6, 74.6)        | 11.7 (1.8, 63.5)         | –                     | –                        |

\* Percentages may not total 100 because of rounding.

§ Other histologic types include adenocarcinoma, squamous-cell carcinoma, and pseudosarcomatous differentiation.

The best response among patients who had a response was defined as a confirmed complete or partial response; among patients who did not have a response, the best response was defined as stable disease or progressive disease.

Abbreviations: CPS, combined positive score; ECOG PS, Eastern Cooperative Oncology Group performance status; FGFR, fibroblast growth factor receptor; Max, maximum; Min, minimum; PD(L)-1, programmed cell death protein/programmed cell death ligand-1.



**Table S6. Baseline Characteristics Available for Trial Population Comparison, Prioritized by Clinical Relevance According to Clinical Experts**

| Rank* | Characteristic                                                         |
|-------|------------------------------------------------------------------------|
| 1     | Bellmunt risk score (0-1, $\geq 2$ )                                   |
| 2     | ECOG PS (0, 1)                                                         |
| 3     | Presence of liver metastases (yes, no)                                 |
| 4     | Presence of visceral metastases (yes, no)                              |
| 5     | Origin of primary disease (upper urinary tract, bladder or other site) |
| 6     | Smoking status (never smoked**, other)                                 |
| 7     | History of diabetes or hyperglycemia (yes, no)                         |
| 8     | Geographic region (Western Europe, US, rest of the world)              |
| 9     | Age (median; $\geq 75$ years, $< 75$ years)                            |
| 10    | Male (yes, no)                                                         |

\* Ranked from (1) being the most likely to (10) being the least likely to be a treatment effect modifier.

\*\* "Other" includes "former user," "current user," "not reported or unknown."

Abbreviations: ECOG PS, Eastern Cooperative Oncology Group performance status.

**Table S7. Baseline characteristics reported in EV-301 that could not be appropriately matched**

| Characteristic                                                                                                            | Reason for exclusion                                                                                                            |
|---------------------------------------------------------------------------------------------------------------------------|---------------------------------------------------------------------------------------------------------------------------------|
| Histologic type at initial diagnosis (urothelial or transitional-cell carcinoma, urothelial carcinoma mixed types, other) | Categories not comparable to those recorded in THOR                                                                             |
| Presence of lymph node only metastases (yes, no)                                                                          | Presence of lymph node metastases was recorded in THOR, but data does not indicate if it was the <u>only</u> type of metastases |
| Prior systemic therapies ( $\geq 3$ )                                                                                     | THOR limited to 1-2 prior therapies                                                                                             |
| Best response among patients who previously received CPI (response, no response)                                          | Not recorded in THOR                                                                                                            |
| Median time since diagnosis of metastatic or locally advanced disease                                                     | THOR only recorded time since diagnosis (not time since metastatic diagnosis)                                                   |

Abbreviations: CPI, checkpoint inhibitor; ITC, indirect treatment comparison.

**Table S8. Sensitivity Analysis: OS and PFS Results for Erdafitinib vs 1 or 2 Prior Lines Subgroup from EV-301**

|                  | Erdafitinib vs EV |                   |
|------------------|-------------------|-------------------|
|                  | Base Case         | 1-2 Prior Lines   |
| OS HR (95% CrI)  | 0.92 (0.54, 1.57) | 0.93 (0.54, 1.60) |
| PFS HR (95% CrI) | 0.93 (0.55, 1.56) | 0.90 (0.54, 1.52) |

Abbreviations: CrI, credible interval; EV, enfortumab vedotin; HR, hazard ratio; PFS, progression-free survival; OS, overall survival.

**Table S9. Sensitivity Analysis: Erdafitinib vs EV Results with Short-term and Longer-term Follow-up from EV-301**

| Survival          | N (ESS)   | Base-case Erdafitinib vs EV (11.1-Month Follow-up) |                            | Erdafitinib vs EV (23.75-Month Follow-up) |                            |
|-------------------|-----------|----------------------------------------------------|----------------------------|-------------------------------------------|----------------------------|
|                   |           | HR (95% CrI)                                       | Probability Better than EV | HR (95% CrI)                              | Probability Better than EV |
| OS                | 197 (126) | 0.92 (0.54, 1.57)                                  | 62.13%                     | 0.91 (0.54; 1.53]                         | 63.45%                     |
| PFS               | 197 (126) | 0.93 (0.55, 1.56)                                  | 60.50%                     | 0.91 (0.54, 1.52)                         | 63.57%                     |
| Response          | N (ESS)   | OR (95% CrI)                                       | Probability better than EV | OR (95% CrI)                              | Probability better than EV |
| cORR              | 197 (126) | 1.43 (0.44, 4.56)                                  | 72.63%                     | 1.44 (0.45, 4.60)                         | 73.25%                     |
| cCR               | 197 (126) | 2.91 (0.27, 30.57)                                 | 81.3%                      | 2.49 (0.24, 25.28)                        | 78.08%                     |
| Safety            | N (ESS)   | OR (95% CrI)                                       | Probability better than EV | OR (95% CrI)                              | Probability better than EV |
| Any TRAE          | 197 (126) | 8.59 (1.49, 48.52)                                 | 0.79%                      | 9.11 (1.58, 51.26)                        | 0.64%                      |
| Any Grade 3+ TRAE | 197 (126) | 0.74 (0.34, 1.60)                                  | 77.86%                     | 0.73 (0.33, 1.58)                         | 78.79%                     |

Abbreviations: cCR, confirmed complete response; cORR, objective response rate; CrI, credible interval; EV, enfortumab vedotin; ESS, effective sample size; HR, hazard ratio; OR, odds ratio; OS, overall survival; PFS, progression-free survival; TRAE, treatment related adverse event.

**Table S10. Additional Safety Analysis: Erdafitinib vs EV Results for Outcomes Only Reported with Longer-term Follow-up from EV-301**

|                                          | Odds Ratio (95% CrI) | Probability Erdafitinib Is Better than EV | Risk Ratio (95% CrI) |
|------------------------------------------|----------------------|-------------------------------------------|----------------------|
| Any serious TRAE                         | 0.56 (0.21, 1.47)    | 88.0%                                     | 0.62 (0.27, 1.38)    |
| Any TRAE leading to treatment withdrawal | 0.55 (0.16, 1.86)    | 83.0%                                     | 0.60 (0.20, 1.74)    |
| Any TRAE leading to death                | 0.27 (0.02, 3.70)    | 83.8%                                     | 0.27 (0.02, 3.64)    |

Abbreviations: CrI, credible interval; EV, enfortumab vedotin; TRAE, treatment-related adverse event.

**Figure S1. Sensitivity Analysis: Cumulative Baseline Characteristics Adjustment OS Results**

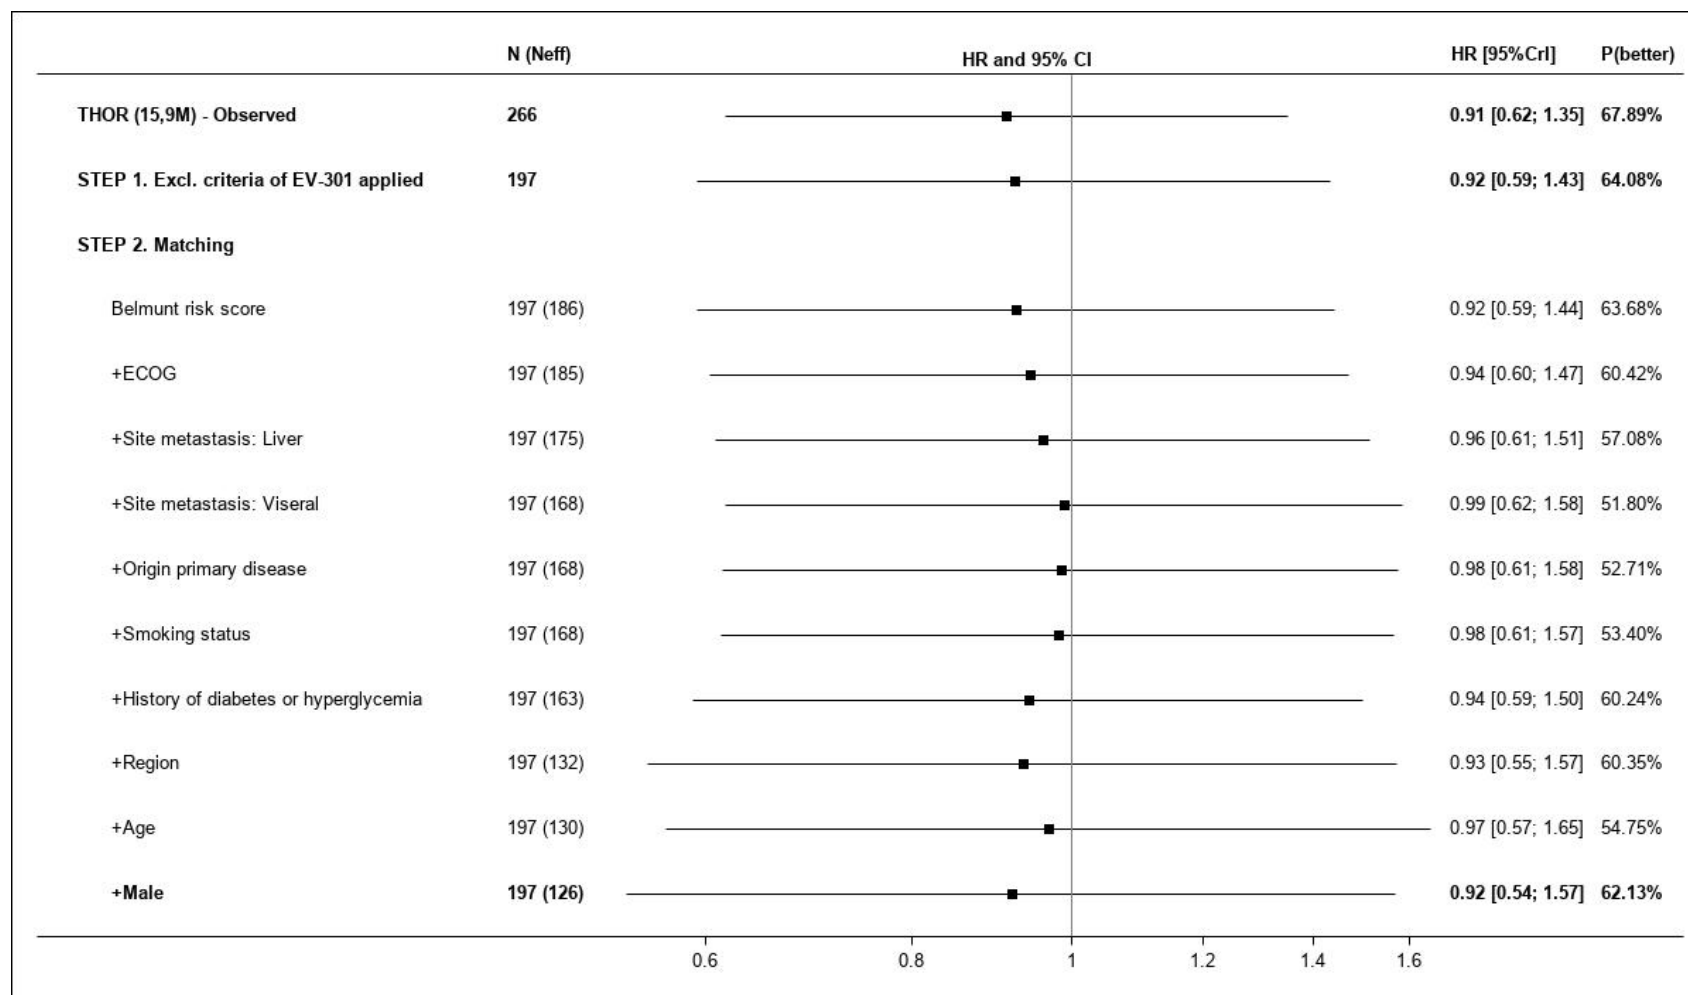

Abbreviations: CrI, credible interval; ECOG PS, Eastern Cooperative Oncology Group performance status; ESS, effective sample size; EV, enfortumab vedotin; HR, hazard ratio; Neff, effective sample size; OS, overall survival; P(better), probability of erdafitinib being better than EV.

**Figure S2. Sensitivity Analysis: Cumulative Baseline Characteristic Adjustment PFS Results**

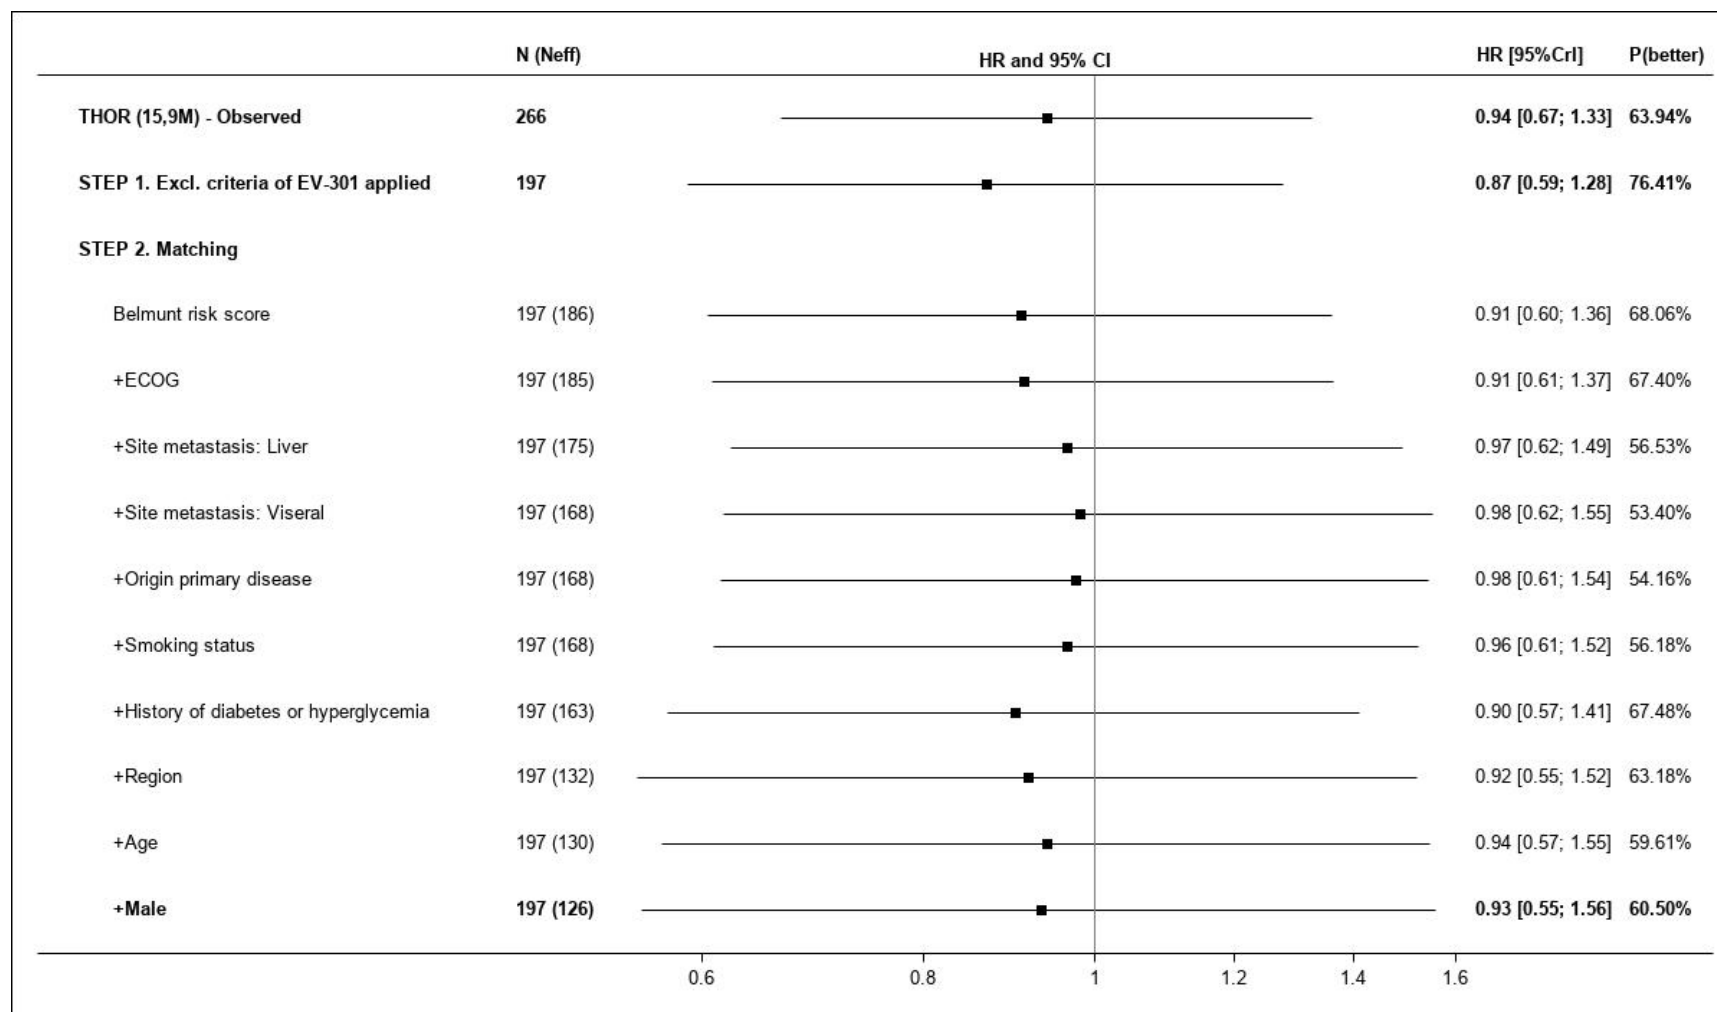

Abbreviations: CrI, credible interval; ECOG PS, Eastern Cooperative Oncology Group performance status; EV, enfortumab vedotin; HR, hazard ratio; Neff, effective sample size; PFS, progression-free survival; P(better), probability of erdafitinib being better than EV.

**Figure S3. Posterior Distributions of the Hazard Ratios**

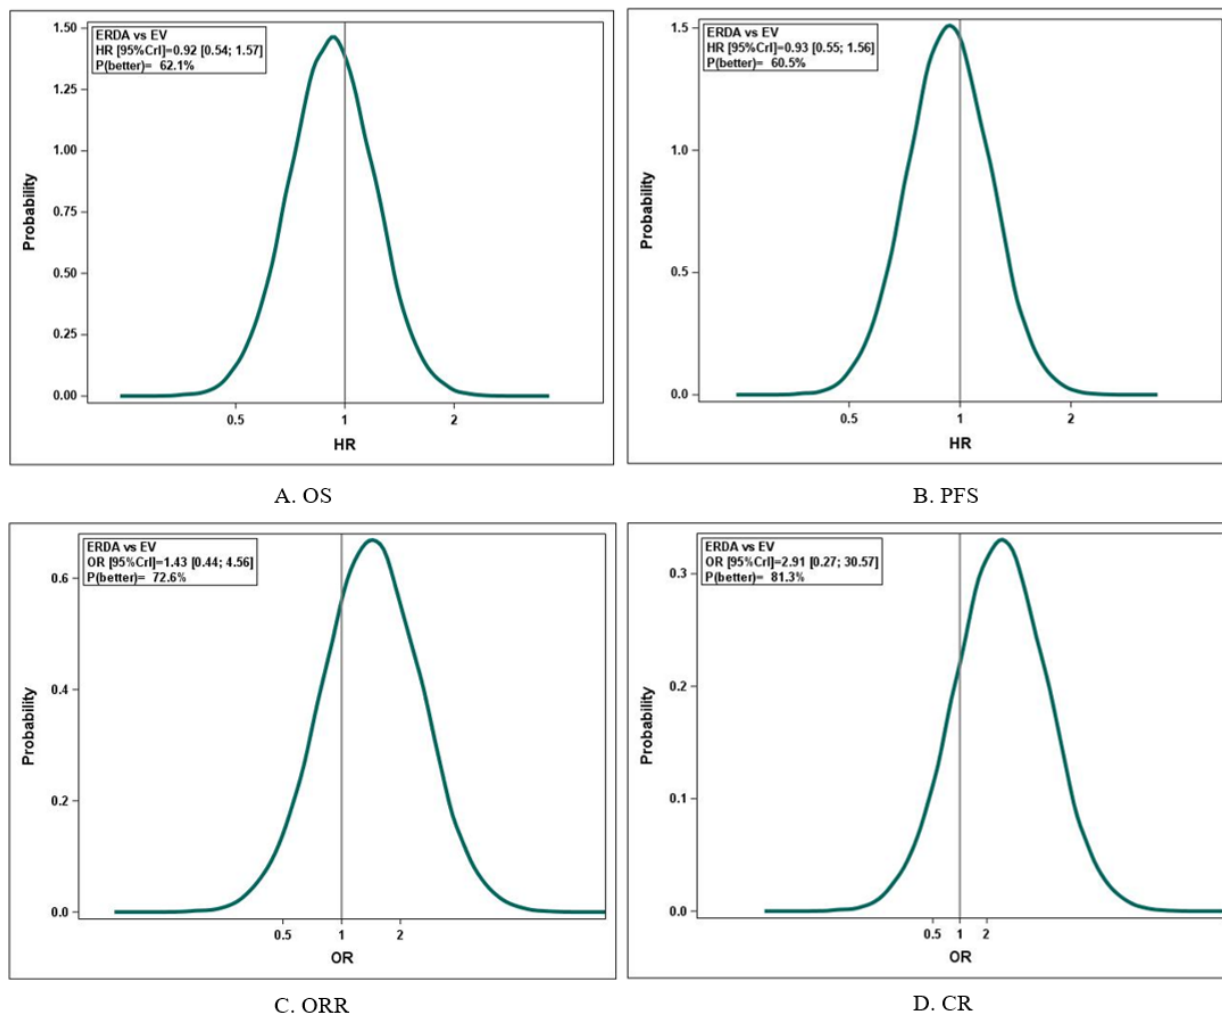

(A) OS, (B) PFS, (C) cORR, and (D) cCR between erdafitinib and EV.

Abbreviations: CHEMO, chemotherapy; ERDA, erdafitinib; EV, enfortumab vedotin; HR, hazard ratio; OR, odds ratio.

**Figure S4. Sensitivity Analysis: Cumulative Baseline Characteristic Adjustment cORR Results**

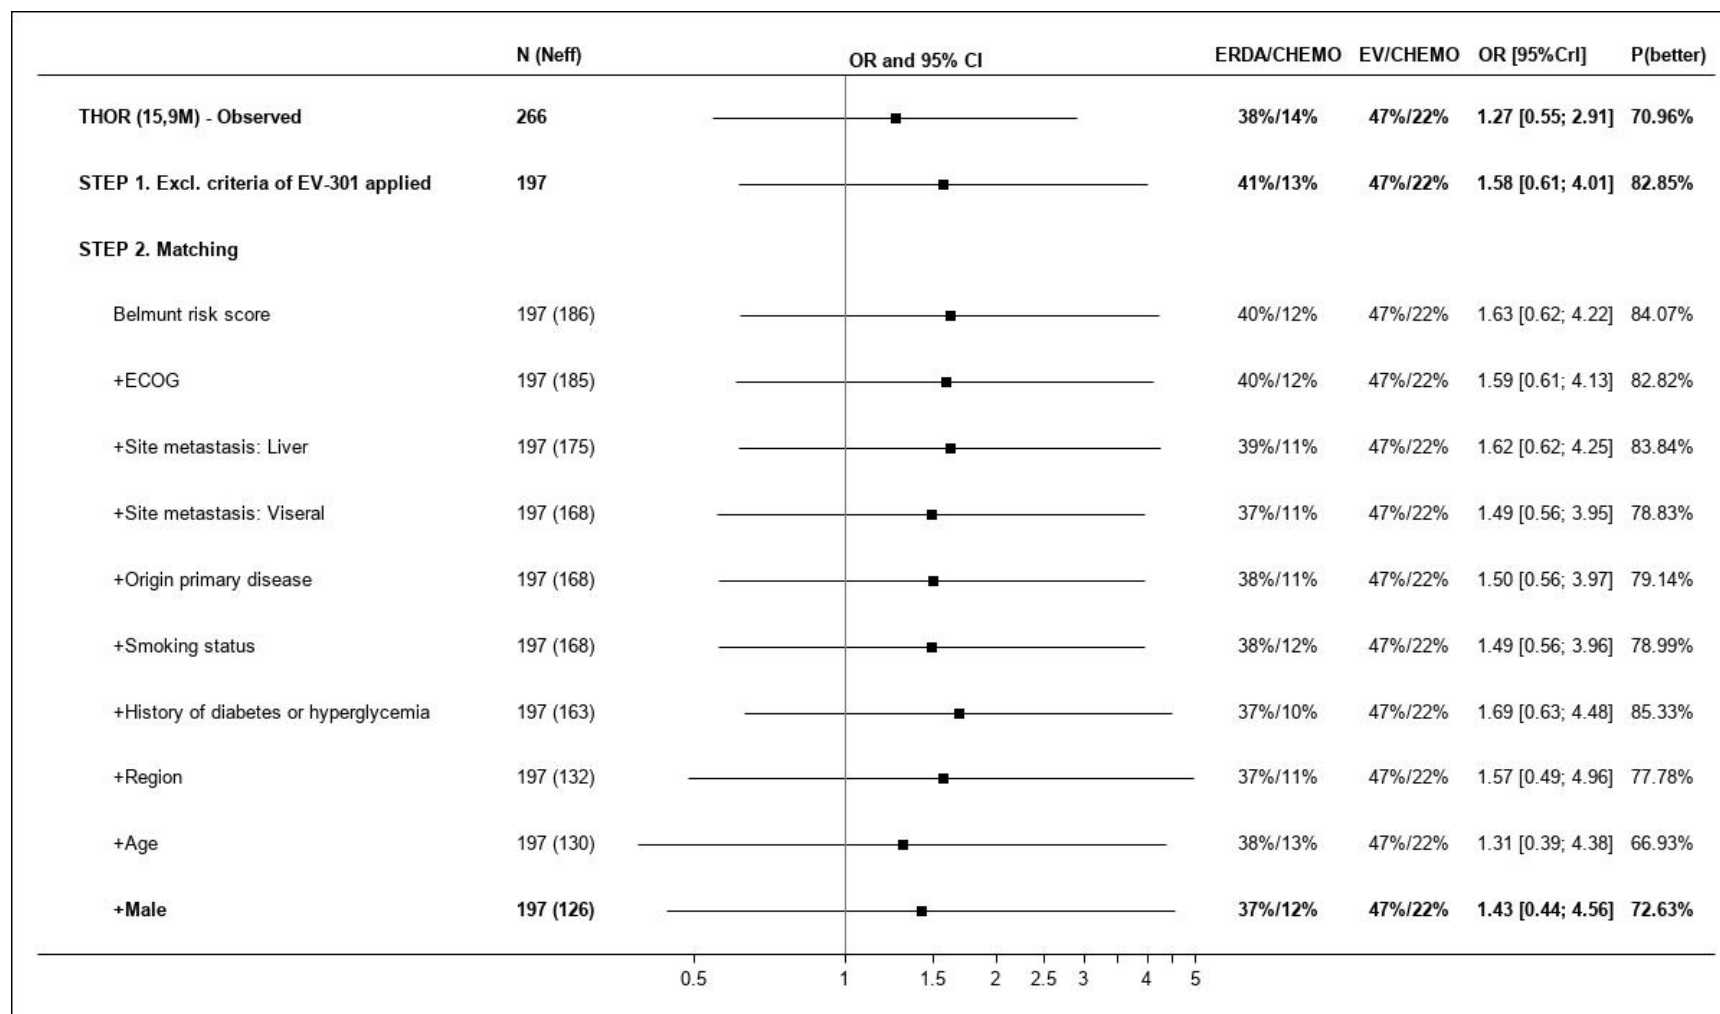

Abbreviations: cORR, confirmed objective response rate; ECOG PS, Eastern Cooperative Oncology Group performance status; ERDA, erdafitinib; ESS, effective sample size; EV, enfortumab vedotin; Neff, effective sample size; OR, odds ratio; P(better), probability of erdafitinib being better than EV.

**Figure S5. Sensitivity Analysis: Cumulative Baseline Characteristic Adjustment cCR Results**

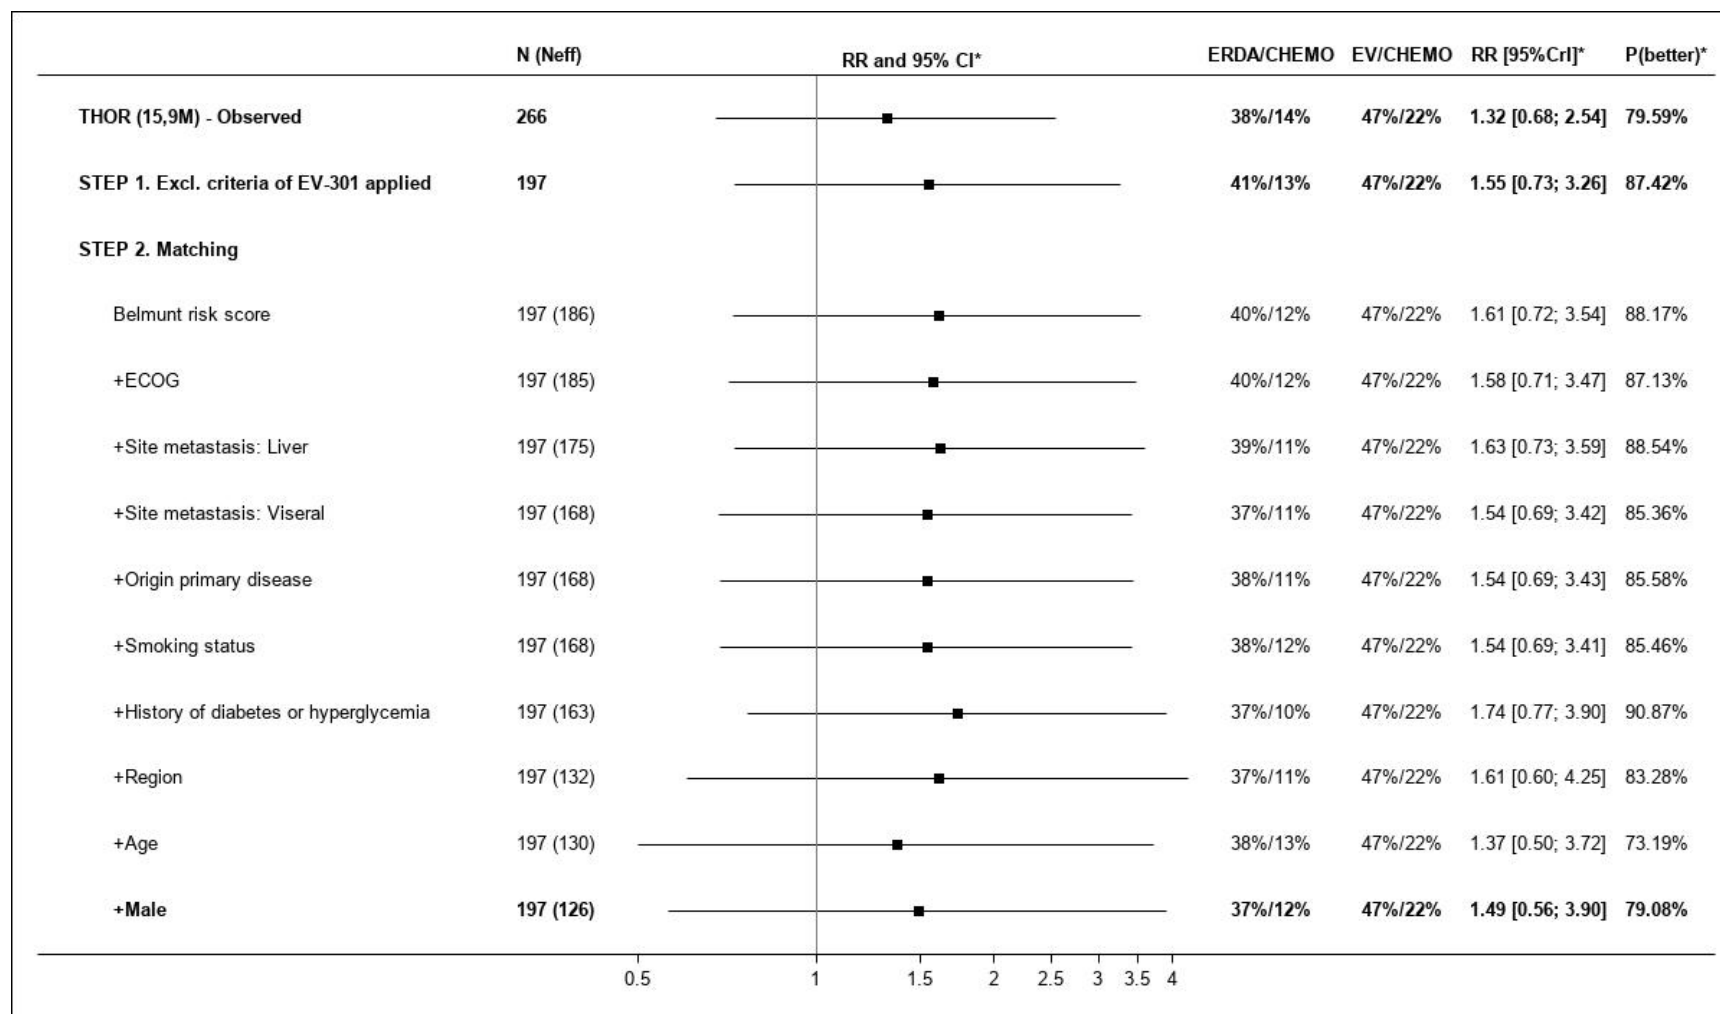

Abbreviations: cCR, confirmed complete response; CrI, credible interval; ECOG PS, Eastern Cooperative Oncology Group performance status; ERDA, erdafitinib; EV, enfortumab vedotin; HR, hazard ratio; Neff, effective sample size; P(better), probability of erdafitinib being better than EV; RR, risk ratio.
